# Supplementary material for: A polyphasic approach in the identification and biochemical characterization of Dunaliella tertiolecta with biodiesel potential from a saltern in Mauritius
Source: PeerJ. 2024 Dec 12;12:e18325. doi: 10.7717/peerj.18325 (PMC11646422; doi:10.7717/peerj.18325)
Supplement: Supplemental Information 2 [file peerj-12-18325-s002.xlsx]

## Sheet: Sheet1
		cell density (cells/mL)
		0.5 M	1.0M	2.0M	3.0M	4.0M
Day 3	Rep 1	3967934	3592588	2091208	2520174	965173
	Rep 2	3914313	3646209	1983967	2252070	1018793
	Average	3.94112e+06	3.6194e+06	2.03759e+06	2386122	991983
	SD	37915.8	37915.8	75830.8	189578	37915.1
Day 6	Rep 1	12868975	11367594	8043109	4236037	2627415
	Rep 2	12225526	11689319	8203971	4128796	2573795
	Average	1.25473e+07	1.15285e+07	8123540	4.18242e+06	2600605
	SD	454987	227494	113747	75830.8	37915.1
Day 8	Rep 1	16944150	16086219	11964644	5844659	2841898
	Rep 2	16247081	16676047	12164684	5469314	3002760
	Average	1.65956e+07	16381133	12064664	5.65699e+06	2922329
	SD	492902	417071	141450	265409	113747
Day 10	Rep 1	19035359	20536739	13566044	7828626	3967934
	Rep 2	28418986	18445531	13834148	7935868	4021554
	Average	2.37272e+07	19491135	13700096	7882247	3994744
	SD	6.63523e+06	1.47871e+06	189578	75831.5	37915.1
Day 13	Rep 1	23217776	33941922	21233809	14906562	5415693
	Rep 2	23003293	27507434	21394671	14477597	5844659
	Average	2.31105e+07	30724678	21314240	1.46921e+07	5630176
	SD	151662	4.54987e+06	113747	303324	303325
Day 15	Rep 1	24451052	33941922	25469846	17962944	7077936
	Rep 2	24182949	35228819	24880018	17265875	6863453
	Average	2.4317e+07	3.45854e+07	25174932	1.76144e+07	6.97069e+06
	SD	189577	909974	417071	492902	151662
Day 17	Rep 1	26971227	36998303	26971227	20697601	7721385
	Rep 2	26917606	39840202	26166916	20643981	8311213
	Average	2.69444e+07	3.84193e+07	2.65691e+07	20670791	8016299
	SD	37915.8	2.00953e+06	568734	37915.1	417071
Day 20	Rep 1	30295712	43432791	29813125	24611915	9222765
	Rep 2	30456574	43647274	30134852	24558294	9383627
	Average	30376143	4.354e+07	2.9974e+07	2.45851e+07	9303196
	SD	113747	151662	227495	37915.8	113747
Day 23	Rep 1	33405714	50832452	34478129	27239330	11206732
	Rep 2	35121578	51100555	34049163	26756744	10616904
	Average	34263646	5.09665e+07	34263646	26998037	10911818
	SD	1.2133e+06	189577	303325	341240	417071
Day 24	Rep 1	41287962	54907627	40001064	33352094	14692080
	Rep 2	40269168	55443834	38821408	33030369	14477597
	Average	40778565	5.51757e+07	39411236	3.31912e+07	1.45848e+07
	SD	720396	379156	834143	227494	151662
Day 27	Rep 1	42842963	53513488	39732960	34424508	14799321
	Rep 2	43432791	52065728	38499684	34049163	15067425
	Average	43137877	52789608	39116322	3.42368e+07	14933373
	SD	417071	1.02372e+06	872058	265409	189578
Day 29	Rep 1	45899344	56516249	44129860	39357615	16247081
	Rep 2	46971759	57856767	44290722	37909856	16247081
	Average	4.64356e+07	57186508	44210291	3.86337e+07	16247081
	SD	758312	947889	113747	1.02372e+06	0
Day 32	Rep 1	45876100	54830330	41128812	34980060	14692851
	Rep 2	46351554	52357510	43109354	34780500	16696831
	Average	46113827	53593920	42119083	34880280	15694841
	SD	336197	1.74855e+06	1.40045e+06	141110	1.41703e+06
