# Supplementary material for: A polyphasic approach in the identification and biochemical characterization of Dunaliella tertiolecta with biodiesel potential from a saltern in Mauritius
Source: PeerJ. 2024 Dec 12;12:e18325. doi: 10.7717/peerj.18325 (PMC11646422; doi:10.7717/peerj.18325)
Supplement: Supplemental Information 3 [file peerj-12-18325-s003.xlsx]

## Sheet: Sheet1
	Absorbance for pigment concentration determination								Pigment concentration
	0.5 M NaCl		480 nm	510 nm	645 nm	663 nm			0.5 M NaCL		Chl a (mg/g)	Total Carotenoids (mg/g)
		REP 1	0.088	0.03	0.051	0.145				REP 1	8.52155	3.1205
		REP2	0.057	0.021	0.05	0.143				REP2	8.408	2.00955
		REP 3	0.088	0.031	0.053	0.156				REP 3	9.19315	3.11305
										Average	8.70757	2.7477
										SD	0.424343	0.639268
	1.0 M NaCl		480 nm	510 nm	645 nm	663 nm			3M NaCL		Chl a (mg/g)	Total Carotenoids (mg/g)
		REP 1	0.093	0.039	0.045	0.157				REP 1	9.36425	3.24345
		REP2	0.09	0.038	0.045	0.156				REP2	9.30075	3.1369
		REP 3	0.094	0.042	0.049	0.163				REP 3	9.69145	3.2591
										Average	9.45215	3.21315
										SD	0.209658	0.0664964
	2.0 M NaCl		480 nm	510 nm	645 nm	663 nm			2M NaCL		Chl a (mg/g)	Total Carotenoids (mg/g)
		REP 1	0.057	0.03	0.049	0.163				REP 1	9.69145	1.9425
		REP2	0.063	0.033	0.05	0.155				REP2	9.17	2.14815
		REP 3	0.065	0.031	0.037	0.113				REP 3	6.67785	2.23905
					0.0453333	0.143667				Average	8.5131	2.1099
										SD	1.61062	0.15193
	3.0 M NaCl		480 nm	510 nm	645 nm	663 nm			3.0M NaCL		Chl a (mg/g)	Total Carotenoids (mg/g)
		REP 1	0.055	0.039	0.034	0.119				REP 1	7.0992	1.79945
		REP2	0.054	0.04	0.037	0.132				REP2	7.88435	1.754
		REP 3	0.058	0.041	0.035	0.119				REP 3	7.08575	1.89855
					0.0353333	0.123333				Average	7.35643	1.81733
										SD	0.457239	0.0739157
	4.0 M NaCl		480 nm	510 nm	645 nm	663 nm			4.0M NaCL		Chl a (mg/g)	Total Carotenoids (mg/g)
		REP 1	0.049	0.042	0.036	0.107				REP 1	6.3103	1.5491
		REP2	0.053	0.039	0.026	0.081				REP2	4.7938	1.72345
		REP 3	0.041	0.028	0.037	0.111				REP 3	6.55085	1.3494
										Average	5.88498	1.54065
										SD	0.952616	0.187168
