# Supplementary material for: A polyphasic approach in the identification and biochemical characterization of Dunaliella tertiolecta with biodiesel potential from a saltern in Mauritius
Source: PeerJ. 2024 Dec 12;12:e18325. doi: 10.7717/peerj.18325 (PMC11646422; doi:10.7717/peerj.18325)
Supplement: Supplemental Information 4 [file peerj-12-18325-s004.xlsx]

## Sheet: Sheet1
	CHNS analysis of microalgal biomass
		Nitrogen content in %					Carbon content in %					Hydrogen content in %					Sulphur content in %
		Rep 1	Rep 2	Average	SD		Rep 1	Rep2	Average	SD		Rep 1	Rep 2	Average	SD		Rep 1	Rep 2	Average	SD
	0.5M	4.891	4.084	4.4875	0.570635		36.995	36.088	36.5415	0.641346		11.349	15.035	13.192	2.6064		Below detection limit	Below detection limit
	1.0 M	6.377	6.324	6.3505	0.0374767		39.282	39.342	39.312	0.0424264		15.982	14.884	15.433	0.776403		Below detection limit	Below detection limit
	2.0 M	5.283	5.704	5.4935	0.297692		37.214	37.271	37.2425	0.0403051		15.164	15.612	15.388	0.316784		Below detection limit	Below detection limit
	3.0 M	5.389	4.862	5.1255	0.372645		37.938	38.972	38.455	0.731148		16.929	16.308	16.6185	0.439113		Below detection limit	Below detection limit
	4.0 M	4.186	3.546	3.866	0.452548		29.391	28.066	28.7285	0.936916		12.103	11.537	11.82	0.400222		Below detection limit	Below detection limit
		Protein estimation using using the nitrogen-to-protein conversion factor of 4.78
		0.5 M		1.0 M		2.0 M		3.0 M		4.0 M
	Rep 1	23.379		30.4821		25.2527		25.7594		20.0091
	Rep2	19.5215		30.2287		27.2651		23.2404		16.9499
	Average	21.4503		30.3554		26.2589		24.4999		18.4795
	SD	2.72764		0.179138		1.42297		1.78124		2.16318
