# Supplementary material for: A polyphasic approach in the identification and biochemical characterization of Dunaliella tertiolecta with biodiesel potential from a saltern in Mauritius
Source: PeerJ. 2024 Dec 12;12:e18325. doi: 10.7717/peerj.18325 (PMC11646422; doi:10.7717/peerj.18325)
Supplement: Supplemental Information 5 [file peerj-12-18325-s005.xlsx]

## Sheet: Sheet1
0.5M						1.0 M						2.0 M						3.0 M						4.0 M
	M	W1	W2	%Lipid content			M	W1	W2	%Lipid content			M	W1	W2	%Lipid content			M	W1	W2	%Lipid content			W1	W1	W2	%Lipid content
rep 1	0.0502	28.6021	28.6105	16.7331		rep 1	0.05011	29.0204	29.0304	19.9162		rep 1	0.05017	28.1232	28.1319	17.361		rep 1	0.05048	28.3509	28.3584	14.8772		rep 1	0.05071	28.5164	28.5226	12.1672
rep 2	0.05017	28.7822	28.7898	15.288		rep 2	0.05015	28.7041	28.7117	15.1944		rep 2	0.05073	28.5549	28.5632	16.3414		rep 2	0.05091	28.2633	28.2718	16.6176		rep 2	0.0509	28.5736	28.5803	13.1238
rep 3	0.05052	28.1475	28.1551	15.1029		rep 3	0.0505	28.6171	28.6263	18.3366		rep 3	0.05045	28.8078	28.8164	17.1853		rep 3	0.05068	28.1474	28.1561	17.0087		rep 3	0.05036	28.6411	28.6475	12.7284
				15.708					Average	17.8157					Average	16.9626					Average	16.1678					Average	12.6731
				0.89254					SD	2.40359					SD	0.54506					SD	1.1347					SD	0.48066
