# Supplementary material for: A polyphasic approach in the identification and biochemical characterization of Dunaliella tertiolecta with biodiesel potential from a saltern in Mauritius
Source: PeerJ. 2024 Dec 12;12:e18325. doi: 10.7717/peerj.18325 (PMC11646422; doi:10.7717/peerj.18325)
Supplement: Supplemental Information 6 [file peerj-12-18325-s006.xlsx]

## Sheet: Sheet1
		Carbohydrate estimation
	Absorbance at 485 nm
	Salinity	REP 1	REP 2	REP 3
	0.5 M	0.98	1.07	1.085
	1 M	0.942	0.748	0.79					Carbohydrate content % = ( conc of carbohydrate in mg/mL / sample volume added into the reaction well ) x dilution factor } x total volume from the hydrolysis / divide mass of biomass used
	2 M	0.535	0.577	0.534					Sample volume added into reaction well = 0.1 mL
	3 M	0.408	0.313	0.383					Dilution factor = 20 (0.1 ml diluted to 2mL)
	4 M	0.547	0.467	0.503					total volume from the hydrolysis =14 mL
									mass of microalgal biomass used= 50mg
	Concentration in µg/mL (calculated from standard curve using y=0.0011x+0.0012)
	Salinity	REP 1	REP 2	REP 3
	0.5 M	889.818	971.636	985.273
	1 M	855.273	678.909	717.091
	2 M	485.273	523.455	484.364
	3 M	369.818	283.455	347.091
	4 M	496.182	423.455	456.182
	Concentration in mg/mL
	Salinity	REP 1	REP 2	REP 3
	0.5 M	0.889818	0.971636	0.985273
	1 M	0.855273	0.678909	0.717091
	2 M	0.485273	0.523455	0.484364
	3 M	0.369818	0.283455	0.347091
	4 M	0.496182	0.423455	0.456182
	Carbohydrate content
	Salinity	REP 1	REP 2	REP 3	Average	SD
	0.5 M	49.8298	54.4116	55.1753	53.1389	2.89108
	1 M	47.8953	38.0189	40.1571	42.0238	5.19605
	2 M	27.1753	29.3135	27.1244	27.871	1.24944
	3 M	20.7098	15.8735	19.4371	18.6735	2.50698
	4 M	27.7862	23.7135	25.5462	25.6819	2.03975
